# Supplementary material for: Temporal and technical variability of human gut metagenomes
Source: PubMed Central journal article supplement (PMC4416267; doi:10.1186/s13059-015-0639-8), 2015-04-08
Supplement: 13059_2015_639_MOESM2_ESM.pdf [file 13059_2015_639_MOESM2_ESM.pdf]

# Nearest neighbor plot (COGs)

**Subject**

- Alien
- Bugkiller
- Halbarad
- Peacemaker
- Scavenger
- Daisy
- Tigress
- Non-self samples

**Preservation condition**

- Fresh frozen
- RNALater (RT, 1 week)
- RNALater (+4-10°C, 1 week)
- RNALater (+4°C, 24h)

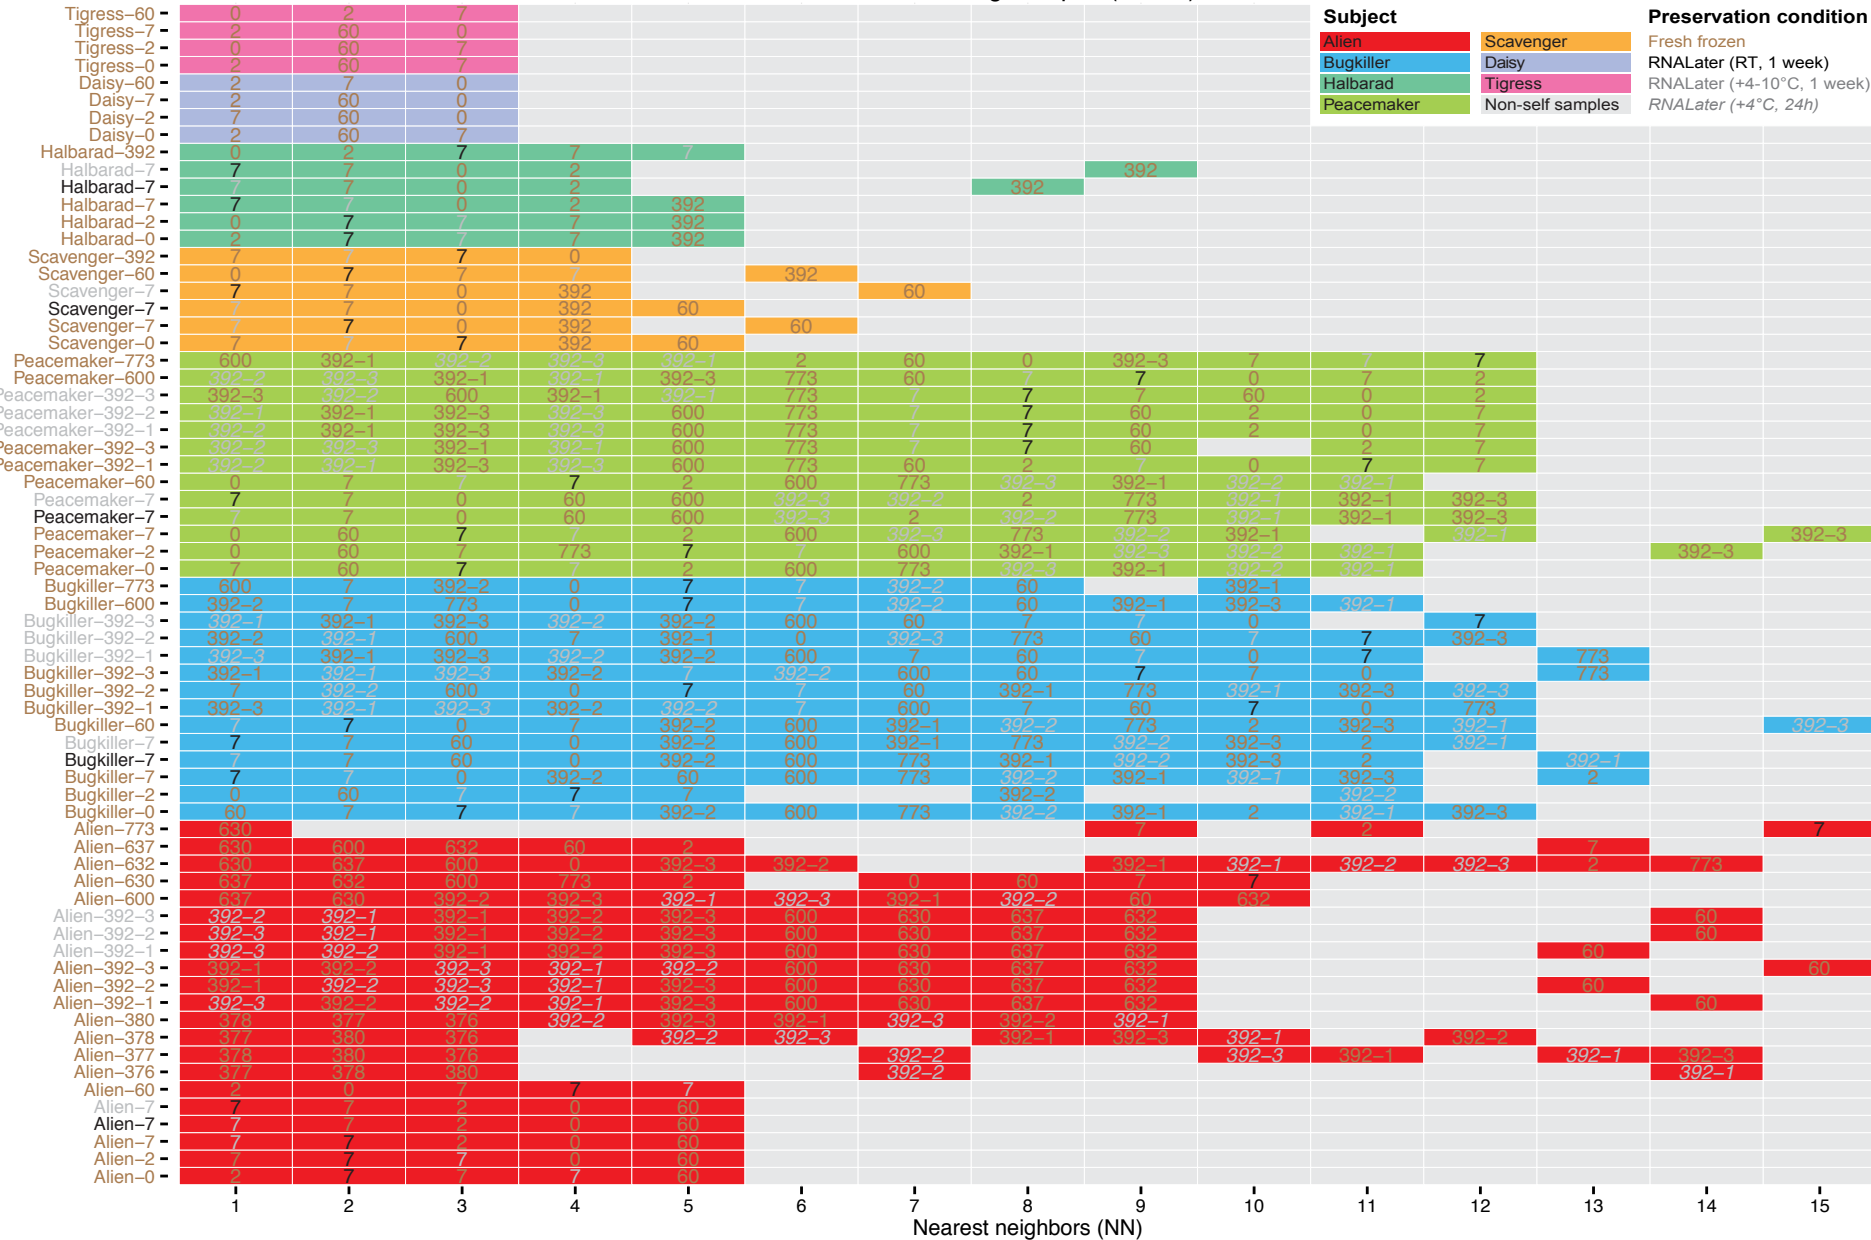

Nearest neighbors (NN)
