# Supplementary material for: Temporal and technical variability of human gut metagenomes
Source: PubMed Central journal article supplement (PMC4416267; doi:10.1186/s13059-015-0639-8), 2015-04-08
Supplement: 13059_2015_639_MOESM3_ESM.pdf [file 13059_2015_639_MOESM3_ESM.pdf]

Nearest neighbor plot (KEGG KOs)

**Subject**

|                   |                         |                            |
|-------------------|-------------------------|----------------------------|
| <b>Alien</b>      | <b>Scavenger</b>        | Fresh frozen               |
| <b>Bugkiller</b>  | <b>Daisy</b>            | RNALater (RT, 1 week)      |
| <b>Halbarad</b>   | <b>Tigress</b>          | RNALater (+4-10°C, 1 week) |
| <b>Peacemaker</b> | <b>Non-self samples</b> | RNALater (+4°C, 24h)       |

**Preservation method**

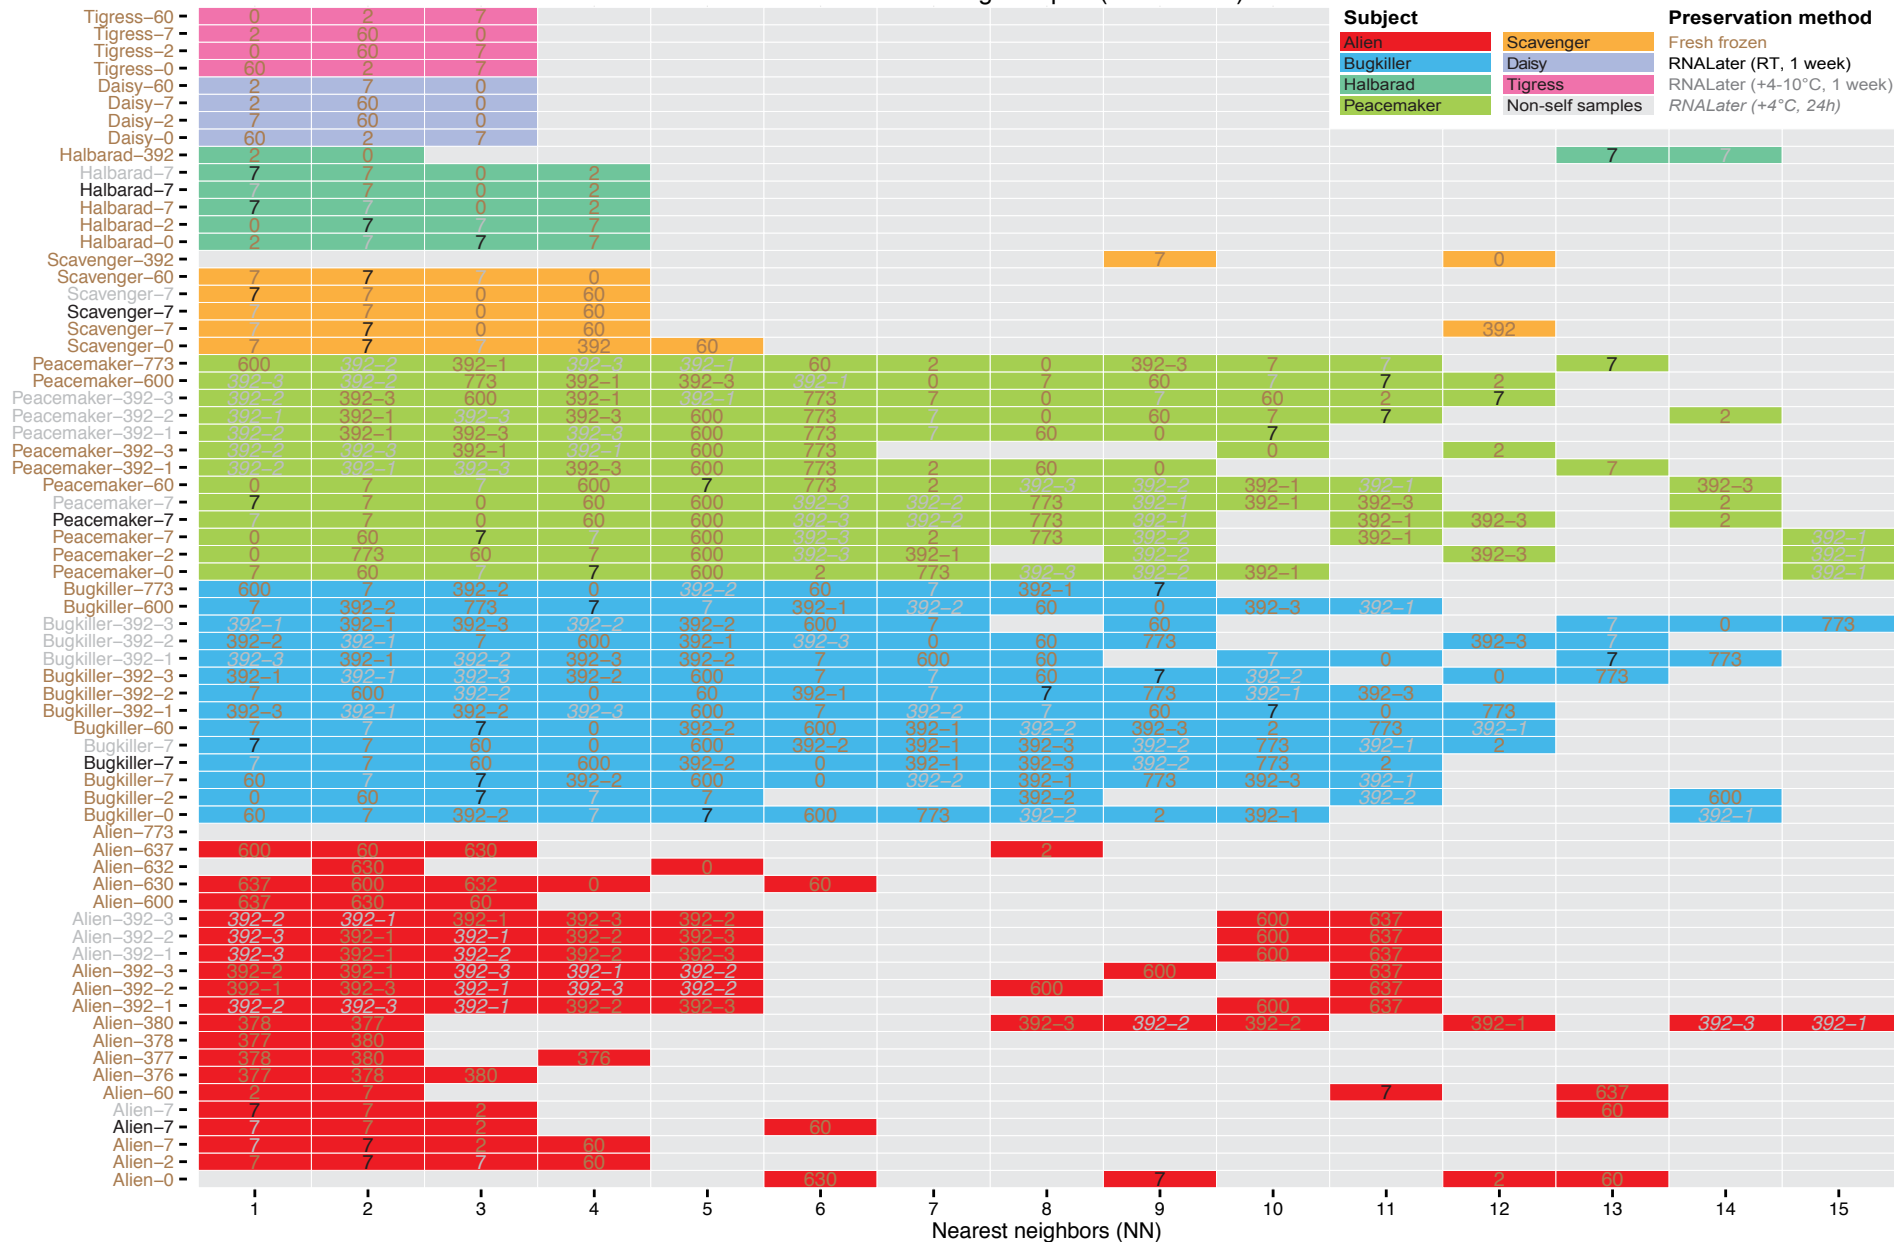

Nearest neighbors (NN)
