# Supplementary material for: Temporal and technical variability of human gut metagenomes
Source: PubMed Central journal article supplement (PMC4416267; doi:10.1186/s13059-015-0639-8), 2015-04-08

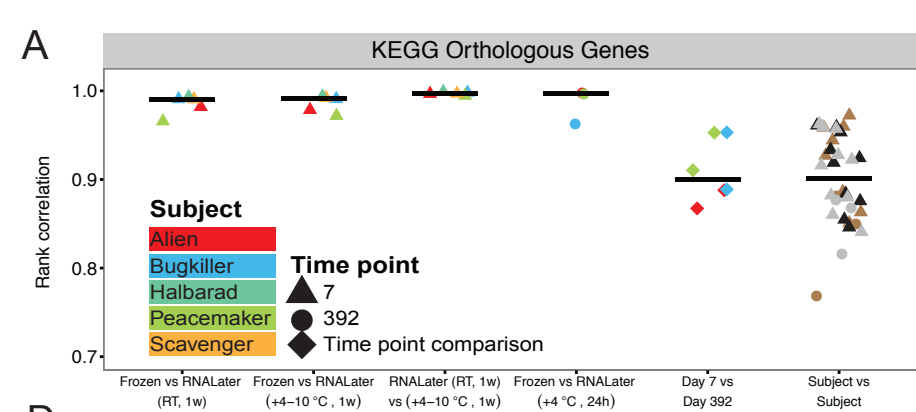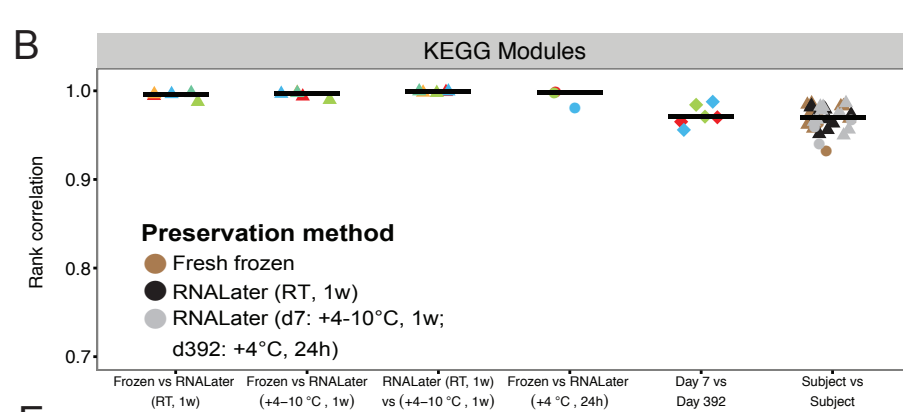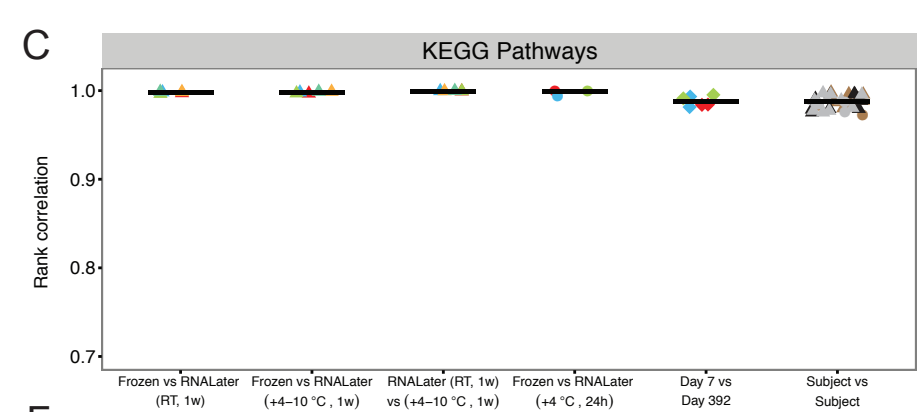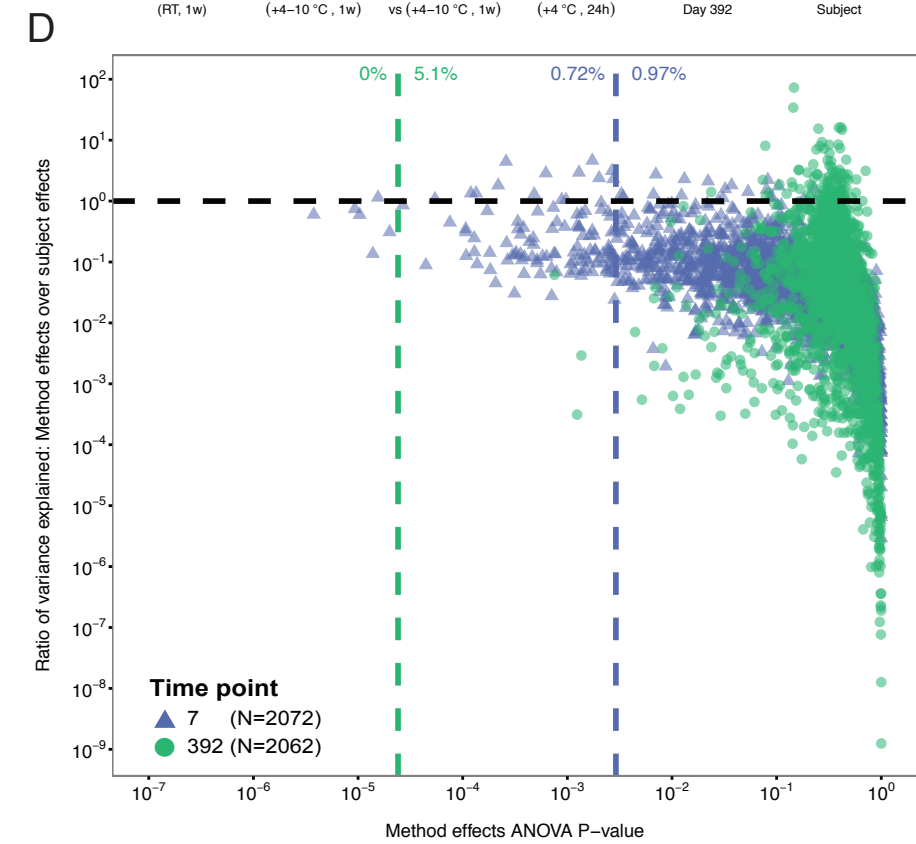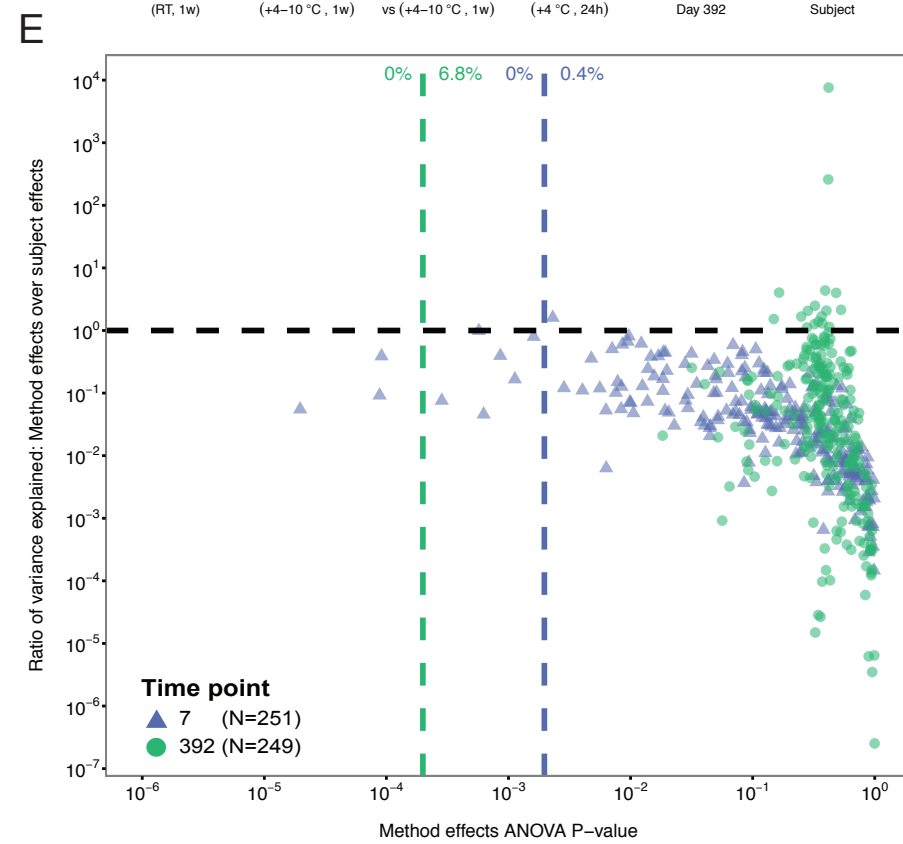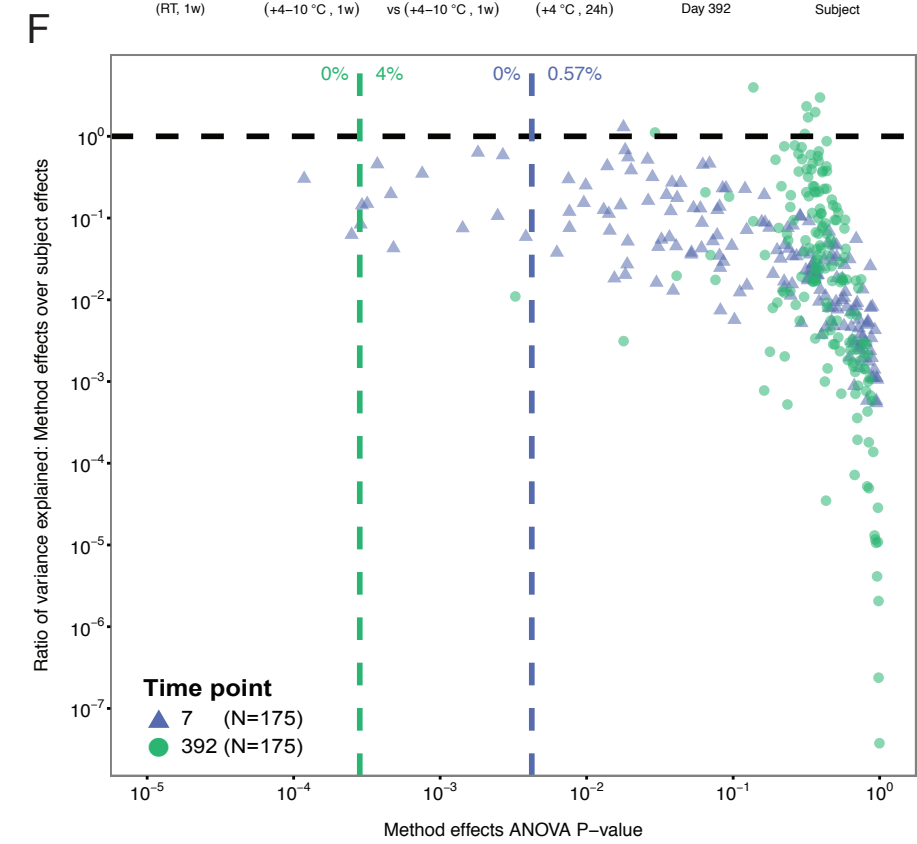

Supplement: 13059_2015_639_MOESM4_ESM.pdf [file 13059_2015_639_MOESM4_ESM.pdf]
